# Supplementary material for: A Quick Method to Synthesize Extrachromosomal Circular DNA In Vitro
Source: MDPI journal article supplement (doi:10.3390/molecules28104236), 2023-05-22
Supplement: s1 [file s1]

# A Quick Method to Synthesize Extrachromosomal Circular DNA In Vitro

Shanru Zuo <sup>1,2,†</sup>, Xueguang Li <sup>1,†</sup>, Yide Yang <sup>1</sup>, Junhua Zhou <sup>1</sup> and Quanyuan He <sup>1,\*</sup>

Supplementary Materials

Figures

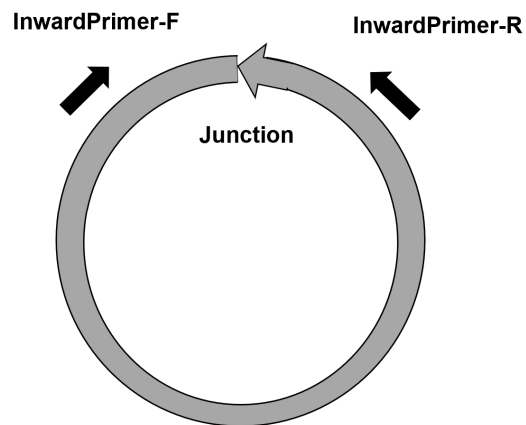

**Figure S1.** Schematic illustration of the inward PCR primer design.

## Tables

**Table S1.** The information of the used primers in the study.

| Primer name | sequence(5'→3')              |
|-------------|------------------------------|
| 2392-1F     | CCACAGAAATGTGGACCTGG         |
| 2392-1R     | GGCCTTCTAATGGTATCTTAAGG      |
| 2392-2F     | GAAATGTGGACCTGGAAGGG         |
| 2392-2R     | TGTGGGGCCTTCTAATGGTATCTTAAGG |
| 2392-3F     | CATAGTGAAGTCTATGCCGTAC       |
| 2392-3R     | CAAATGAGTGATGATTCCGC         |
| BRCA1-1F    | GAGTCAGTCACATGGACTTAAC       |
| BRCA1-1R    | GACTGACTCAGTCTGCCAAAAG       |
| BRCA1-2F    | CAGTCACATGGACTTAACAATAATG    |
| BRCA1-2R    | ACTCGACTGACTCAGTCTGCC        |
| BRCA1-3F    | CTGTTTCTCTTAGTTGGCCAC        |
| BRCA1-3R    | GAAGTGGGAGATTCTAGCTTAG       |
| LIMD1-1F    | TGCTGGATGTGTGCAGCTTATG       |
| LIMD1-1R    | GCCCAGCAGAGTAGGGAAAG         |
| LIMD1-2F    | GGATGTGTGCAGCTTATGGTAG       |
| LIMD1-2R    | AGCAGCCCAGCAGAGTAGGGAAAG     |
| LIMD1-3F    | GGACTTGAACCTGACAGTTCAGTTC    |
| LIMD1-3R    | CAGCAGTACCCAATATGACCTGTG     |

**Table S2.** The information of the used inward-PCR primers in the study.

| Primer name     | sequence(5'→3')        |
|-----------------|------------------------|
| Inward-BRCA1-F  | CTGTTTCTCTTAGTTGGCCAC  |
| Inward-BRCA1-R  | GAAGTGGGAGATTCTAGCTTAG |
| Inward-2392F    | CCATCCTACAGCCTGGGGTG   |
| Inward-2392R    | CATTCTCCTGGCCAATCACTC  |
| Inward-LIMD1-F  | GTCTCAAGATGCCAGTTTC    |
| Inward-LIMD1- R | CAACAAGGCAAGACCTTGCTC  |

**Table S3.** The detailed protocol of the QuickLAMA.

| Procedure | Reaction System            |             | Condition                                                        |                     |          | Reagent<br>(Company,<br>CatNo.)                           | Description                                                                                                                                                                                                    | Time  |
|-----------|----------------------------|-------------|------------------------------------------------------------------|---------------------|----------|-----------------------------------------------------------|----------------------------------------------------------------------------------------------------------------------------------------------------------------------------------------------------------------|-------|
| Step 1    | 2*PCR buffer for KODFX     | 25 $\mu$ l  | Pre-denature                                                     | 94 $^{\circ}$ C     | 2min     | KODFX<br>(TOYOBO,<br>KFX-101)                             | PCR to amply the target<br>eccDNA region from the<br>genome to synthesize the<br>fragment A. And using this<br>system to synthesize the C-<br>long, C-short, D-short and<br>D-long fragments (see<br>Figure 2) | 1-3h  |
|           | 2mMdNTPs                   | 10 $\mu$ l  | Denature                                                         | 98 $^{\circ}$ C     | 10sec    |                                                           |                                                                                                                                                                                                                |       |
|           | Primer-F(10pmol/ $\mu$ l)  | 1.5 $\mu$ l | Annealing                                                        | (Tm-5) $^{\circ}$ C | 30sec    |                                                           |                                                                                                                                                                                                                |       |
|           | Primer-R(10pmol/ $\mu$ l)  | 1.5 $\mu$ l | Extension                                                        | 68 $^{\circ}$ C     | 1kb/min  |                                                           |                                                                                                                                                                                                                |       |
|           | genomic-DNA                | x $\mu$ l   | Hold                                                             | 4 $^{\circ}$ C      | $\infty$ |                                                           |                                                                                                                                                                                                                |       |
|           | PCR grade water            | y $\mu$ l   |                                                                  |                     |          |                                                           |                                                                                                                                                                                                                |       |
|           | KODFX                      | 1ul         |                                                                  |                     |          |                                                           |                                                                                                                                                                                                                |       |
|           | Total volume               | 50ul        |                                                                  |                     |          |                                                           |                                                                                                                                                                                                                |       |
| Step 2    | short DNA                  | 20 $\mu$ l  | Pre-denature                                                     | 94 $^{\circ}$ C     | 5min     | Annealing<br>Buffer for DNA<br>Oligo (Solarbio,<br>D2810) | Denature and anneal the C-<br>long, C-short, D-short and<br>D-long fragments and<br>obtain the hybrid fragments<br>with one stick end.                                                                         | 50min |
|           | long DNA                   | 20 $\mu$ l  | Denature                                                         | -5 $^{\circ}$ C     | 3min     |                                                           |                                                                                                                                                                                                                |       |
|           | 5*DNA Annealing buffer     | 10 $\mu$ l  | Annealing                                                        | 30 $^{\circ}$ C     | 3min     |                                                           |                                                                                                                                                                                                                |       |
|           | Total volume               | 50 $\mu$ l  | Hold                                                             | 4 $^{\circ}$ C      | $\infty$ |                                                           |                                                                                                                                                                                                                |       |
|           |                            |             |                                                                  |                     |          |                                                           |                                                                                                                                                                                                                |       |
| Step 3    | DNA ligase reaction buffer | 10 $\mu$ l  | 25 $^{\circ}$ C 0.5h<br><br>inactivation : 65 $^{\circ}$ C 10min |                     |          | T7 DNA Ligase<br>(NEB,M0318S)                             | Ligation of the fragments to<br>form the fragment E as the<br>template for the next step.                                                                                                                      | 40min |
|           | Sticky C                   | 4.5 $\mu$ l |                                                                  |                     |          |                                                           |                                                                                                                                                                                                                |       |
|           | Sticky D                   | 4.5 $\mu$ l |                                                                  |                     |          |                                                           |                                                                                                                                                                                                                |       |
|           | T7 DNA Ligase              | 1 $\mu$ l   |                                                                  |                     |          |                                                           |                                                                                                                                                                                                                |       |
|           | Total volume               | 20 $\mu$ l  |                                                                  |                     |          |                                                           |                                                                                                                                                                                                                |       |

|        |                                                                                                                                                                                                                                                                     |                                                                                                                                                                                                  |                                            |                                                                                                                         |          |
|--------|---------------------------------------------------------------------------------------------------------------------------------------------------------------------------------------------------------------------------------------------------------------------|--------------------------------------------------------------------------------------------------------------------------------------------------------------------------------------------------|--------------------------------------------|-------------------------------------------------------------------------------------------------------------------------|----------|
| Step 4 | 2*PCR buffer for KODFX 25 $\mu$ l<br>2mMdNTPs 10 $\mu$ l<br>Primer-3F(10pmol/ $\mu$ l) 1.5 $\mu$ l<br>Primer-3R(10pmol/ $\mu$ l) 1.5 $\mu$ l<br>Step3 product (template) x $\mu$ l<br>PCR grade water y $\mu$ l<br>KODFX 1 $\mu$ l<br><hr/> Total volume 50 $\mu$ l | Predenature 94 $^{\circ}$ C 2min<br>Denature 98 $^{\circ}$ C 10sec<br>Annealing (Tm-5) $^{\circ}$ C 30sec<br>Extension 68 $^{\circ}$ C 1kb/min<br>Hold 4 $^{\circ}$ C $\infty$<br>} 15~30 cycles | KODFX<br>(TOYOBO,<br>KFX-101)              | PCR to amplify the fragment E. Notice: the Step3 product usually needs to be diluted to avoid adding too much template. | 40min-2h |
| Step 5 | DNA-A/E 39 $\mu$ l<br>T4 PNK reaction buffer 5 $\mu$ l<br>ATP 5 $\mu$ l<br>T4 PNK 1 $\mu$ l<br><hr/> Total volume 50 $\mu$ l                                                                                                                                        | 37 $^{\circ}$ C 30min<br><br>inactive condition: 65 $^{\circ}$ C 20min                                                                                                                           | T4 PNK (NEB,<br>M0201S)                    | Add a phosphate group to the fragment A and E                                                                           | 1h       |
| Step 6 | A-P' 22 $\mu$ l<br>E-P' 22 $\mu$ l<br>10*HIFI Taq DNA<br>Ligase buffer 5 $\mu$ l<br>HIFI Taq DNA Ligase 1 $\mu$ l<br><hr/> Total volume 50 $\mu$ l                                                                                                                  | Denature 95 $^{\circ}$ C 20sec<br>annealing 4 $^{\circ}$ C 1min<br>ligation 65 $^{\circ}$ C 20min<br>} 3 cycles                                                                                  | HIFI Taq DNA<br>Ligase (NEB,<br>M0647)     | LAMA reaction for circularization and nick ligation                                                                     | 1h20min  |
| Step 7 | eccDNA(step6) 34 $\mu$ l<br>25mMATP 4 $\mu$ l<br>10*reaction Buffer 10 $\mu$ l<br>Plasmid-Safe DNase 2 $\mu$ l<br>ddH2O 50 $\mu$ l<br><hr/> Total volume 100 $\mu$ l                                                                                                | 37 $^{\circ}$ C 1h<br>inactive condition: 70 $^{\circ}$ C 30min                                                                                                                                  | Plasmid-Safe<br>ATP-<br>Dependent<br>Dnase | Digest the remained linear DNA                                                                                          | 1.5h     |

|        |                         |  |                                                      |                                  |       |
|--------|-------------------------|--|------------------------------------------------------|----------------------------------|-------|
|        |                         |  | (LGCBiosearch,<br>E3101K)                            |                                  |       |
| Step 8 | Follow the kit's manual |  | E.Z.N.A. Cycle-<br>Pure Kit<br>(omega, D6492-<br>02) | Purify the eccDNA<br>/minicircle | 20min |
